# Supplementary material for: Visible Light Optical Coherence Tomography (OCT) Quantifies Subcellular Contributions to Outer Retinal Band 4
Source: PubMed Central journal article supplement (PMC7998011; doi:10.1167/tvst.10.3.30), 2021-03-26
Supplement: tvst-10-3-30_s002.pdf [file tvst-10-3-30_s002.pdf]

1 Supplemental Materials

2

3 *1. Comparison of methods for correcting radial scans.*

4 For our hybrid radial-raster scan protocol (Figure 2B), an important consideration is foveolar  
5 centration. After data acquisition, centration errors can be corrected in slightly different ways by  
6 methods 1 (angle-by-angle correction) and 2 (global scan protocol correction), as described in  
7 the manuscript. The outer retinal layer contours recovered by method 1 (Figure S1A) show similar  
8 trends as the layer contours recovered by method 2 in the main manuscript (Figure 6D), albeit  
9 with less sharp foveal features. For instance, the ILM layer contour recovered by method 2 shows  
10 a more prominent foveal pit (Figure S1B), and agrees more with normative values<sup>1</sup> of retinal  
11 thickness from other studies. Hence method 2 was chosen for the majority of the results in the  
12 main manuscript.

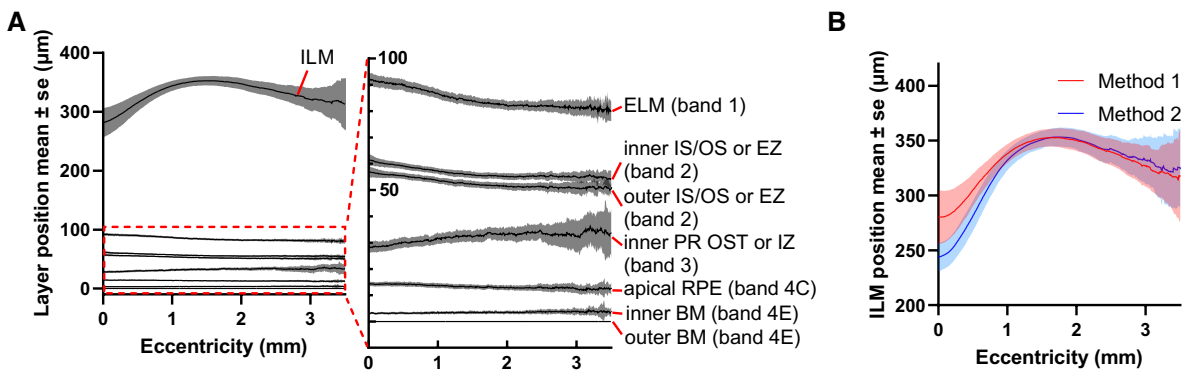

13

14 Figure S1. (A) Retinal layer contours recovered by method 1, averaged across subjects and referenced to BM at 0  
15 microns. (B). Comparison of ILM contours shows that the foveal pit recovered by method 2 is deeper than that recovered  
16 by method 1.

17

18 *2. Rod and Cone PR OST or IZ bands vary with eccentricity.*

19 The appearance of COST/CIZ and ROST/RIZ varied with eccentricity (Figure S2). COST/CIZ was  
20 always well-visualized in the fovea. However, occasionally, COST visualization was diminished

21 in the perifovea (white arrow in zoom). On the other hand, ROST/RIZ was never seen in the  
22 foveola, with visualization improving from the parafovea to the perifovea. These observations can  
23 be explained by the photoreceptor distribution, which transitions from a cone-dominated fovea to  
24 a rod-dominated periphery<sup>2</sup>, and the greater sensitivity of waveguiding in peripheral cones,  
25 relative to other photoreceptors, to incident light angle. Because of these issues, separation of  
26 rod from cone photoreceptor outer segment tips was challenging in some data sets, and was not  
27 pursued further in this study. Variable peripheral COST visibility was reflected in the high  
28 variability of the inner band 3 contour (Figure 6D and Figure S1A).

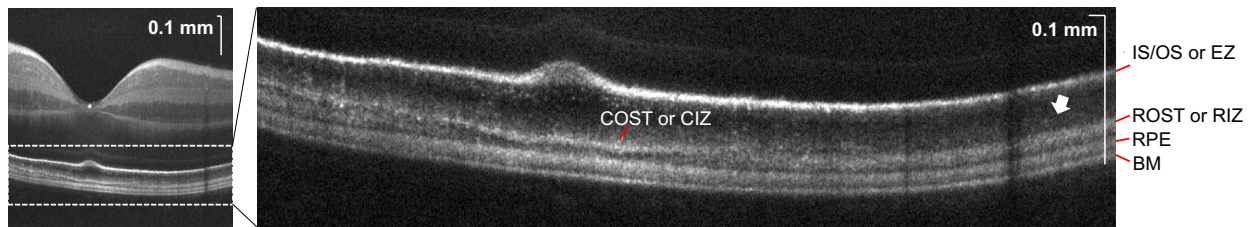

30 Figure S2. Human retinal image with zoom of the outer retina. As shown by the white arrow, the COST or CIZ band  
31 disappears on the right hand side of the image, whereas the ROST or RIZ band remains visible. This may result from  
32 heightened sensitivity of the COST band to incident light angle<sup>3</sup>.

33

### 34 3. Monte Carlo simulation parameter table for assessing RPE multiple scattering effects.

35 A Monte Carlo simulation model (Figure S3A) with realistic RPE parameters<sup>4</sup> (Figure S3B) was  
36 employed in this study to investigate the effects of RPE multiple scattering on BM visualization<sup>4</sup>.  
37 Scattering was confined to a melanosome band (4C) in the apical RPE, while BM (band 4E) was  
38 generated by a Fresnel reflection at the interface between the basal RPE and a medium below  
39 with a slightly different refractive index and a medium with an absorbing lower boundary. A 6  $\mu\text{m}$   
40 diameter, collimated incident beam and an identically sized detector with a 2.5 degree polar  
41 acceptance angle were used in simulation. OCT intensity profiles versus depth were created from  
42 the weighted photons and their times-of-flight, assuming a refractive index of 1.47 and performing

43 Gaussian binning of photons to achieve an OCT axial resolution of 1.0 microns (0.71 microns in  
 44 intensity). This simulation incorporated several simplifying assumptions, including a specular  
 45 reflection for BM, an infinitesimally small true BM thickness, and no scattering from the basal RPE  
 46 or the choriocapillaris. Also, rather than assume the RPE refractive index as in this simulation, *in*  
 47 *vivo* OCT images in the main manuscript were reconstructed assuming a water medium. In spite  
 48 of these differences, the simulation provided a useful preliminary tool to assess methods for  
 49 estimating BM thickness.

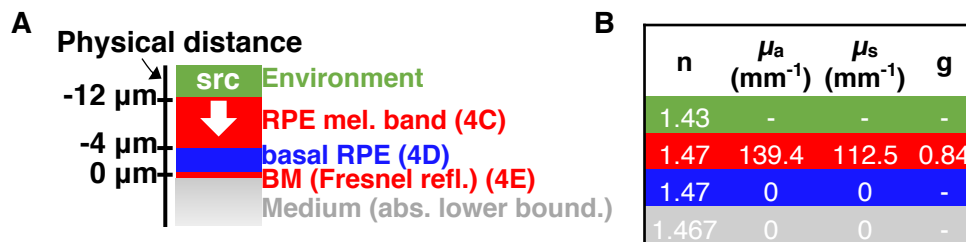

50  
 51 Figure S3. (A) Monte Carlo simulation model (src.: source beam; mel.: melanosome; refl.: reflection; abs.: absorbing).  
 52 (B) Monte Carlo simulation parameters used in Figure 4 to assess RPE multiple scattering. Hyper-reflective bands  
 53 (zones 4C and 4E) are shown in red, and the hypo-reflective basal RPE zone (4D) is shown in blue.

54  
 55 *4. Pair-wise BM thickness comparison*

56 Similar to our analysis of RPE thickness in the main manuscript (Figure 6), we performed pair-  
 57 wise BM thickness comparisons of different macular regions (Figure S4). Relative to the foveal  
 58 region, other macular regions showed no major differences in BM thickness (diagonal line was  
 59 within 95% confidence band for the proportional fit) (Figure S4A). The heatmap of BM thickness  
 60 comparisons between macular areas further supported this conclusion (Figure S4B). While the  
 61 nasal 2.25-4.5mm and foveal regions tended to be slightly thinner and the nasal 0.75-2.25 mm  
 62 region tended to be thicker, further investigation with more subjects is required to confirm these  
 63 observations.

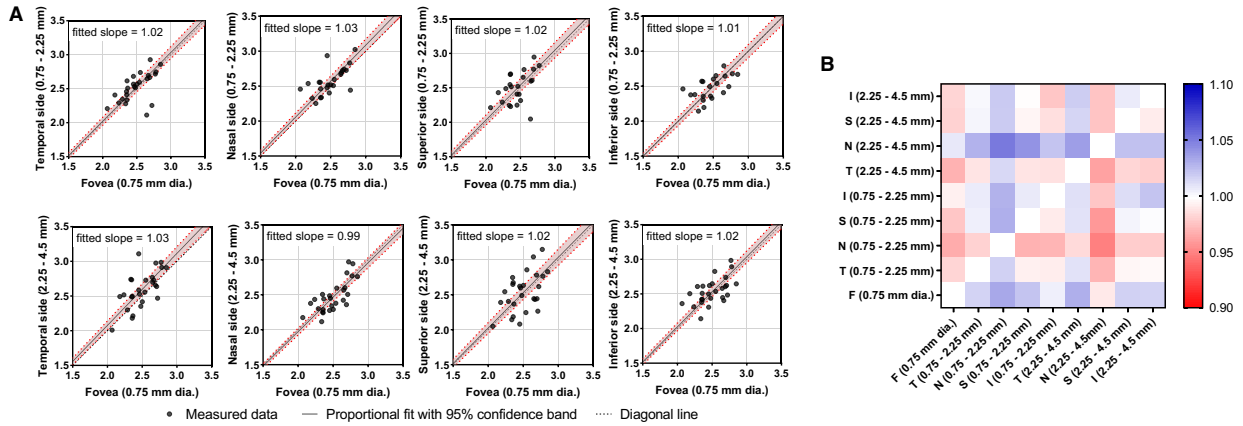

64

65 Figure S4. (A) Detailed comparisons between BM thickness in the fovea and other macular areas (proportional fit with

66 95% confidence band). (B) Heatmap of BM thickness comparisons between different macular areas shows that average

67 topographic variations are typically on the order of a few percent, significantly less than RPE variations (Figure 6B).

68

69 1 Sull, A. C. *et al.* Comparison of spectral/Fourier domain optical coherence tomography instruments for assessment of  
70 normal macular thickness. *Retina* **30**, 235-245, doi:10.1097/IAE.0b013e3181bd2c3b (2010).  
71 2 Curcio, C. A., Sloan, K. R., Kalina, R. E. & Hendrickson, A. E. Human photoreceptor topography. *J Comp Neurol* **292**,  
72 497-523, doi:10.1002/cne.902920402 (1990).  
73 3 Gao, W., Cense, B., Zhang, Y., Jonnal, R. S. & Miller, D. T. Measuring retinal contributions to the optical Stiles-Crawford  
74 effect with optical coherence tomography. *Opt Express* **16**, 6486-6501, doi:10.1364/OE.16.006486 (2008).  
75 4 Zhang, T. *et al.* Visible light OCT improves imaging through a highly scattering retinal pigment epithelial wall. *Optics*  
76 *Letters* **45**, 5945-5948, doi:10.1364/OL.405398 (2020).

77
